# Supplementary material
Source: PubMed Central journal article supplement (PMC8013248)
Supplement: 2938_table.pdf [file 2938_table.pdf]

**On-line Table: Mean costs of clipping and coiling of ruptured cerebral aneurysms**

|                                  | Mean Cost<br>(\$ 2008) | SD      | <i>P</i> Value | Mean Cost<br>(\$ 2008) | SD      | <i>P</i> Value | <i>P</i> Value Clipping<br>vs. Coiling |
|----------------------------------|------------------------|---------|----------------|------------------------|---------|----------------|----------------------------------------|
| All Patients                     |                        |         |                |                        |         |                |                                        |
| Sex                              |                        |         |                |                        |         |                |                                        |
| Male                             | 93,881                 | 155,979 | .32            | 86,347                 | 151,087 | .52            | .35                                    |
| Female                           | 89,308                 | 142,746 |                | 89,055                 | 148,471 |                | .38                                    |
| Age                              |                        |         |                |                        |         |                |                                        |
| <65                              | 88,264                 | 148,284 | .007           | 85,976                 | 152,765 | .28            | .24                                    |
| ≥65                              | 101,880                | 138,748 |                | 90,539                 | 138,801 |                | .04                                    |
| All patients by discharge status |                        |         |                |                        |         |                |                                        |
| Home                             | 67,599                 | 106,968 | <.0001         | 64,604                 | 113,696 | <.0001         | <.0001                                 |
| Short-term facility              | 107,115                | 167,688 |                | 99,966                 | 181,942 |                | .0002                                  |
| Long-term facility               | 109,470                | 128,752 |                | 117,723                | 162,141 |                | <.0001                                 |
| Dead                             | 71,582                 | 126,651 |                | 75,255                 | 126,659 |                | .08                                    |
| Age <65 by discharge status      |                        |         |                |                        |         |                |                                        |
| Home                             | 70,210                 | 104,958 | <.0001         | 65,035                 | 112,721 | <.0001         | .11                                    |
| Short-term facility              | 121,407                | 178,182 |                | 100,047                | 187,414 |                | .16                                    |
| Long-term facility               | 124,008                | 180,980 |                | 125,615                | 173,364 |                | .82                                    |
| Dead                             | 69,059                 | 130,927 |                | 75,302                 | 138,804 |                | .48                                    |
| Age ≥65 by discharge status      |                        |         |                |                        |         |                |                                        |
| Home                             | 87,521                 | 167,723 | <.0001         | 64,667                 | 118,822 | <.0001         | .04                                    |
| Short term facility              | 131,009                | 212,892 |                | 11,417                 | 203,793 |                | .53                                    |
| Long-term facility               | 107,298                | 110,336 |                | 106,041                | 138,411 |                | .86                                    |
| Dead                             | 90,487                 | 129,644 |                | 75,179                 | 105,630 |                | .18                                    |
